# Supplementary material for: Evaluation of polymer–preservative interactions for preservation efficacy: molecular dynamics simulation and QSAR approaches
Source: Royal Society of Chemistry journal article supplement (doi:10.1039/d4nr02162b), 2024-01-01
Supplement: d4nr02162b1.pdf [file d4nr02162b1.pdf]

# Supporting Information

## Evaluation of Polymer-Preservative Interactions for Preservation Efficacy: Molecular Dynamics Simulation and QSAR Approaches

Qisong Xu<sup>1</sup>, Pui Shan Chow<sup>1</sup>, Erte Xi<sup>2</sup>, Randy Marsh<sup>2</sup>, Shikar Gupta<sup>3</sup> and Krishna M. Gupta<sup>1\*</sup>

*<sup>1</sup>Institute of Sustainability for Chemicals, Energy and Environment (ISCE2), Agency for Science, Technology and Research (A\*STAR), 1 Pesek Road, Jurong Island, Singapore 627833, Republic of Singapore*

*<sup>2</sup>Proctor & Gamble, Winton Hill Business Center, 6280 Center Hill Ave. Cincinnati, OH 45224, United States*

*<sup>3</sup>Procter & Gamble International Operations SA SG Branch, Singapore 138547, Singapore*

\*E-mail: [krishna\\_mohan\\_gupta@isce2.a-star.edu.sg](mailto:krishna_mohan_gupta@isce2.a-star.edu.sg)

### Table of Contents

|                          |    |
|--------------------------|----|
| S1. Molecular simulation | S2 |
| S2. QSAR modelling       | S4 |
| S3. Simulation results   | S5 |
| S4. QSAR model results   | S6 |
| References               | S7 |

## S1. Molecular simulation

**Table S1.** Molecular models of polymers in terms of polymer chains and monomers.

| Polymer   | Structure                                                                         | Number of chains | Number of monomers | Total monomers | Monomer molecular weight (g/mol) | Total mass (g) |
|-----------|-----------------------------------------------------------------------------------|------------------|--------------------|----------------|----------------------------------|----------------|
| PET       | 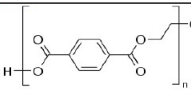 | 18               | 25                 | 450            | 192                              | 86400          |
| PP        |  | 18               | 114                | 2052           | 42                               | 86348          |
| Cellulose |  | 18               | 30                 | 540            | 162                              | 87555          |

**Table S2.** 7-step compression and relaxation scheme.<sup>1</sup>

| Step | Description                             | Duration (ps) |
|------|-----------------------------------------|---------------|
| 1    | Energy minimization at 0 K              | 10            |
| 2    | NPT MD simulation at 293 K and 3000 bar | 300           |
| 3    | NVT MD simulation at 800 K              | 100           |
| 4    | NVT MD simulation at 293 K              | 100           |
| 5    | NPT MD simulation at 293 K and 1000 bar | 300           |
| 6    | Repeat Step (3)-(5) for 29 times        |               |
| 7    | NPT MD simulation at 293 K and 1 bar    | 10000         |

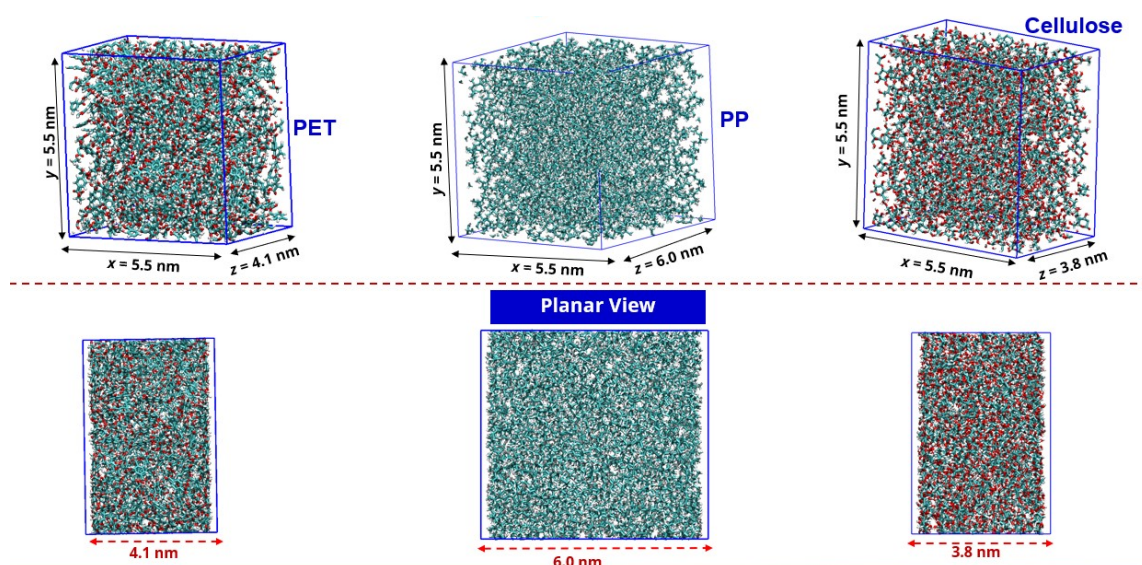

**Figure S1.** Polymer models for adsorption simulation.

**Table S3.** List of preservatives with pKa values, number of neutral and ionic forms.

| Entry | Preservatives         | pKa              | Number of neutral forms | Number of ionic forms                                                                                                                 |
|-------|-----------------------|------------------|-------------------------|---------------------------------------------------------------------------------------------------------------------------------------|
| 1     | Hexanediol            | 14.5             | 10                      | 0                                                                                                                                     |
| 2     | Octanediol            | 14.6             | 10                      | 0                                                                                                                                     |
| 3     | Glyceryl caprylate    | -                | 10                      | 0                                                                                                                                     |
| 4     | Ethylhexylglycerin    | 13.7             | 10                      | 0                                                                                                                                     |
| 5     | Sorbitan caprylate    | -                | 10                      | 0                                                                                                                                     |
| 6     | Benzyl alcohol        | 15.4             | 10                      | 0                                                                                                                                     |
| 7     | Phenethyl alcohol     | 15.88            | 10                      | 0                                                                                                                                     |
| 8     | Phenylpropanol        | 15.96            | 10                      | 0                                                                                                                                     |
| 9     | Hydroxyacetophenone   | 9.15             | 10                      | 0                                                                                                                                     |
| 10    | Phenoxyethanol        | 15.10            | 10                      | 0                                                                                                                                     |
| 11    | Levulinic acid        | 4.65             | 8                       | 2                                                                                                                                     |
| 12    | Succinic acid         | 4.61 and 5.61    | 8                       | 2                                                                                                                                     |
| 13    | Citric acid           | 3.1, 4.7 and 6.4 | 8                       | 1 (C <sub>6</sub> H <sub>7</sub> O <sub>7</sub> <sup>-</sup> ) and<br>1 (C <sub>6</sub> H <sub>6</sub> O <sub>7</sub> <sup>2-</sup> ) |
| 14    | Benzoic acid          | 4.2              | 7                       | 3                                                                                                                                     |
| 15    | <i>p</i> -Anisic acid | 4.47             | 8                       | 2                                                                                                                                     |

## S2. QSAR modelling

**Table S4.** 22 uncorrelated descriptors of preservatives for QSAR modelling.

|    |                            |    |                |
|----|----------------------------|----|----------------|
| 1  | Molecular_Solubility       | 12 | Jurs_PPSA_3    |
| 2  | ALogP                      | 13 | Jurs_FPASA_3   |
| 3  | Molecular_Volume           | 14 | Jurs_RPCG      |
| 4  | Molecular_PolarSurfaceArea | 15 | Shadow_YZ      |
| 5  | Dipole_mag                 | 16 | Shadow_XYfrac  |
| 6  | Kappa_3                    | 17 | Shadow_XZfrac  |
| 7  | SC_3_C                     | 18 | Shadow_YZfrac  |
| 8  | IC                         | 19 | Shadow_nu      |
| 9  | BIC                        | 20 | Shadow_Ylength |
| 10 | CIC                        | 21 | Shadow_Zlength |
| 11 | IAC_Mean                   | 22 | JX             |

All QSAR modelling and sensitivity analysis were performed using the *scikit-learn*<sup>2</sup> and *scikit-optimize*<sup>3</sup> packages. Specifically, *RandomForestRegressor*, *RFE*, *r2\_score* and *mean\_squared\_error* objects in *scikit-learn* package were utilized for random forest (RF), recursive feature elimination (RFE), coefficient of determination ( $R^2$ ) and root-mean-squared error (RMSE), respectively. The *BayesSearchCV* object in *scikit-optimize* package was used to tune the hyperparameters of RF, where **Table S5** lists the range of explored hyperparameters.

**Table S5.** Range of hyperparameters explored for random forest.

| Hyperparameters   | Range of values explored |
|-------------------|--------------------------|
| n_estimators      | [50 to 1000]             |
| max_depth         | ['None', 1 to 5]         |
| min_samples_split | [2 to 5]                 |
| min_samples_leaf  | [1 to 5]                 |

### S3. Simulation results

**Table S6.** PET density at 293 K as a function of number of polymer chains and monomers.

| Simulation system        | Run 1 | Run 2 | Run 3 | Average density<br>(g/cm <sup>3</sup> ) |
|--------------------------|-------|-------|-------|-----------------------------------------|
| 3 chains of 150 monomers | 1.254 | 1.258 | 1.260 | 1.258 ± 0.003                           |
| 6 chains of 75 monomers  | 1.254 | 1.263 | 1.264 | 1.260 ± 0.006                           |
| 18 chains of 25 monomers | 1.259 | 1.258 | 1.252 | 1.260 ± 0.004                           |

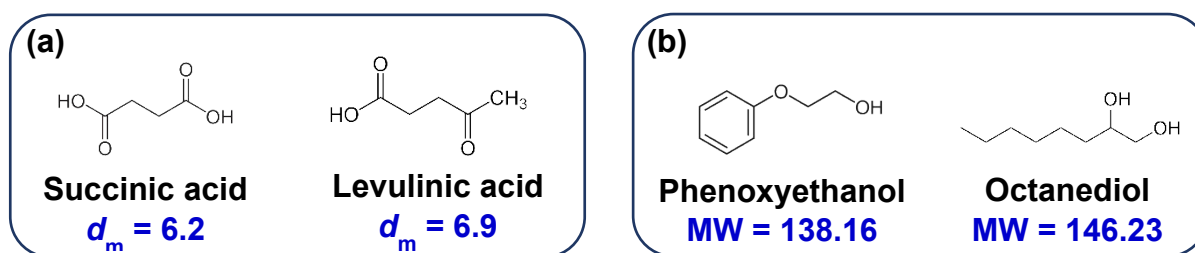

**Figure S2.** Chemical structures, sizes, and molecular weights for (a) organic acid and (b) alcohol preservative.

## S4. QSAR model results

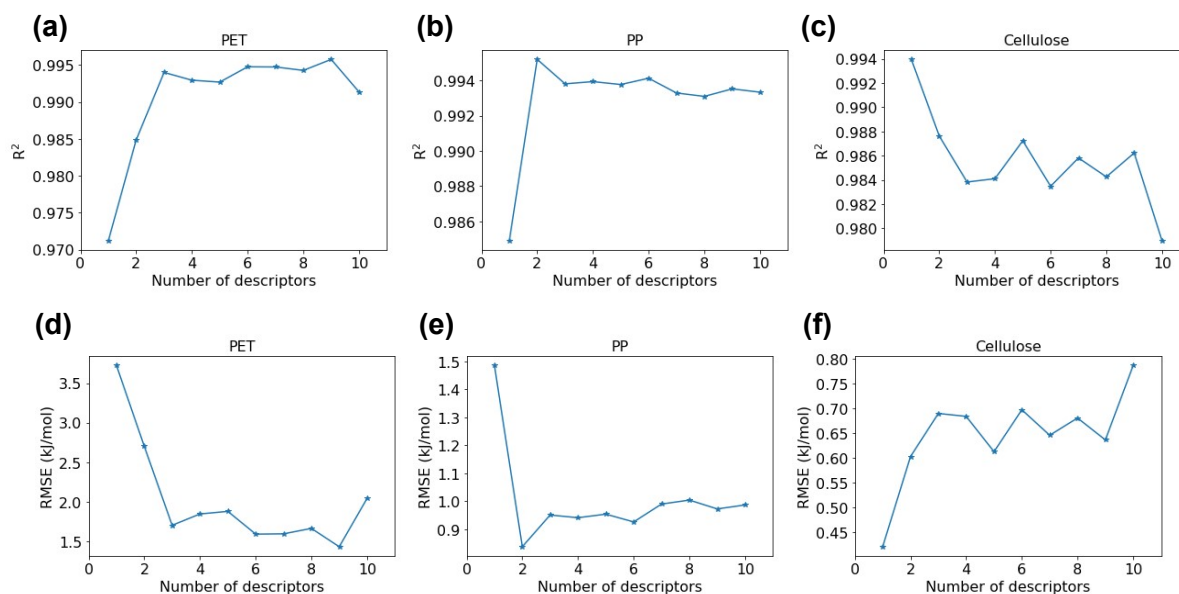

**Figure S3.** Sensitivity analysis of (T1) IEs between preservatives and polymers at interface for various polymers in terms of (a)-(c)  $R^2$  and (d)-(f) RMSE.

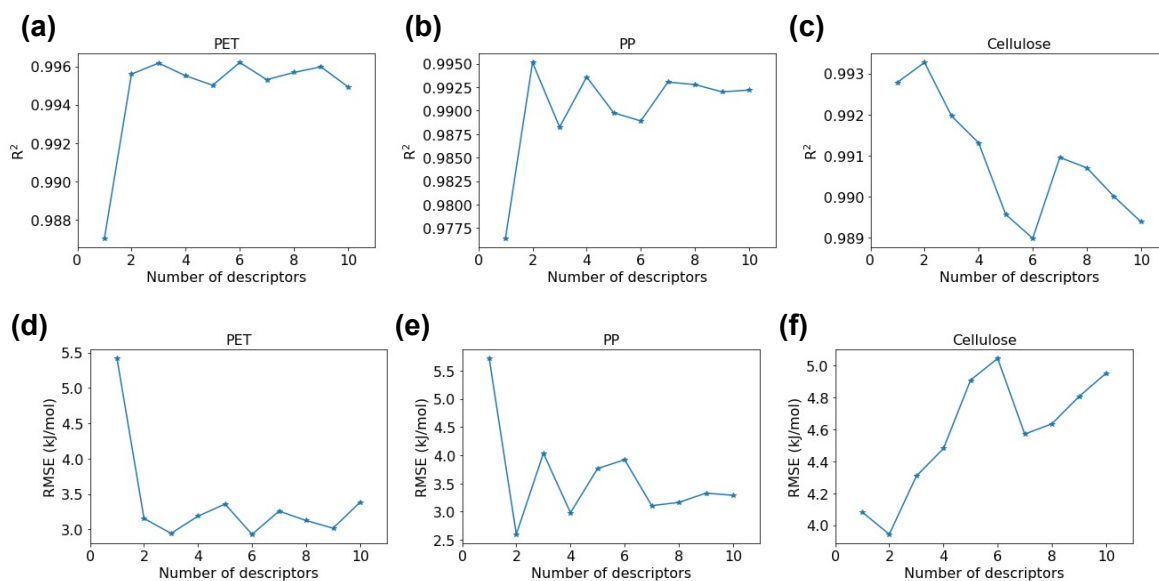

**Figure S4.** Sensitivity analysis of (T2) IEs between preservatives and water for various polymers in terms of (a)-(c)  $R^2$  and (d)-(f) RMSE.

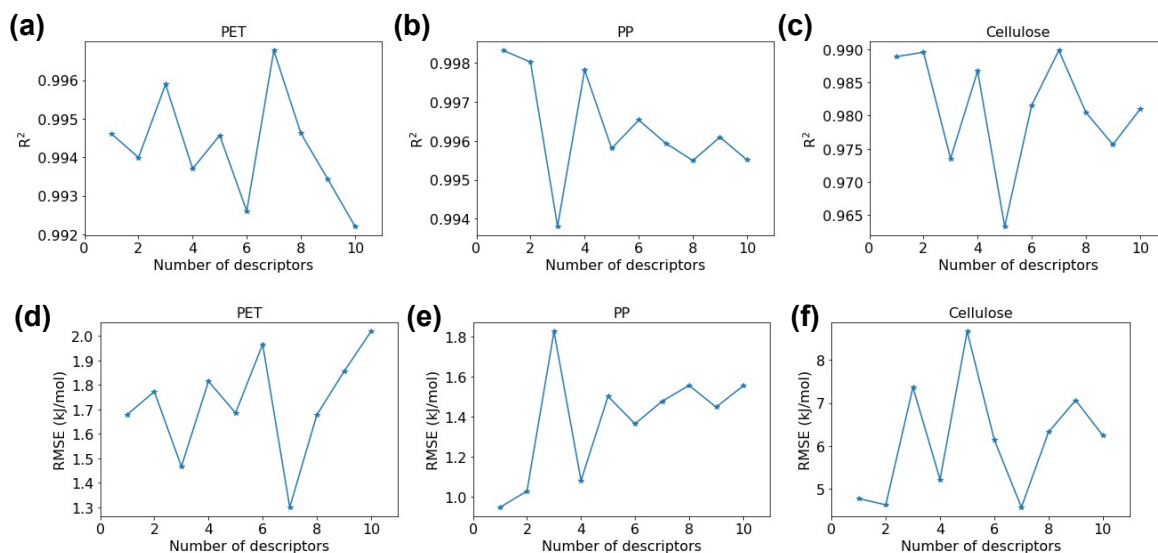

**Figure S5.** Sensitivity analysis of (T3) interior IE between preservatives and polymers for various polymers in terms of (a)-(c)  $R^2$  and (d)-(f) RMSE.

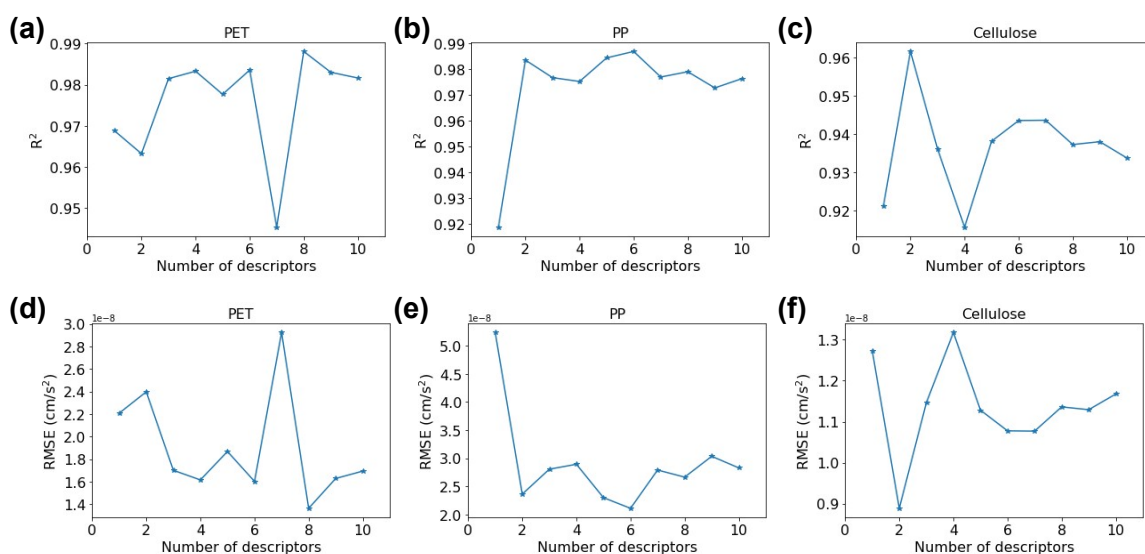

**Figure S6.** Sensitivity analysis of (T4) diffusion coefficients of preservatives in polymers in terms of (a)-(c)  $R^2$  and (d)-(f) RMSE.

## References

1. Shi, Q.; Zhang, K.; Lu, R.; Jiang, J., Water desalination and biofuel dehydration through a thin membrane of polymer of intrinsic microporosity: Atomistic simulation study. *J. Membr. Sci.* **2018**, *545*, 49-56.
2. Pedregosa, F.; Varoquaux, G.; Gramfort, A.; Michel, V.; Thirion, B.; Grisel, O.; Blondel, M.; Prettenhofer, P.; Weiss, R.; Dubourg, V., Scikit-learn: Machine learning in Python. *J. Mach. Learn. Res.* **2011**, *12*, 2825-2830.
3. Head, T.; MechCoder, G. L.; Shcherbatyi, I. J. V. v., scikit-optimize/scikit-optimize: v0. 5.2. **2018**, *5*.
